# Supplementary material
Source: PubMed Central journal article supplement (PMC4147976)
Supplement: ASN.2013070811_ASN2013070811SupplementaryData1.pdf [file ASN.2013070811_ASN2013070811SupplementaryData1.pdf]

# Supplemental Figure 1

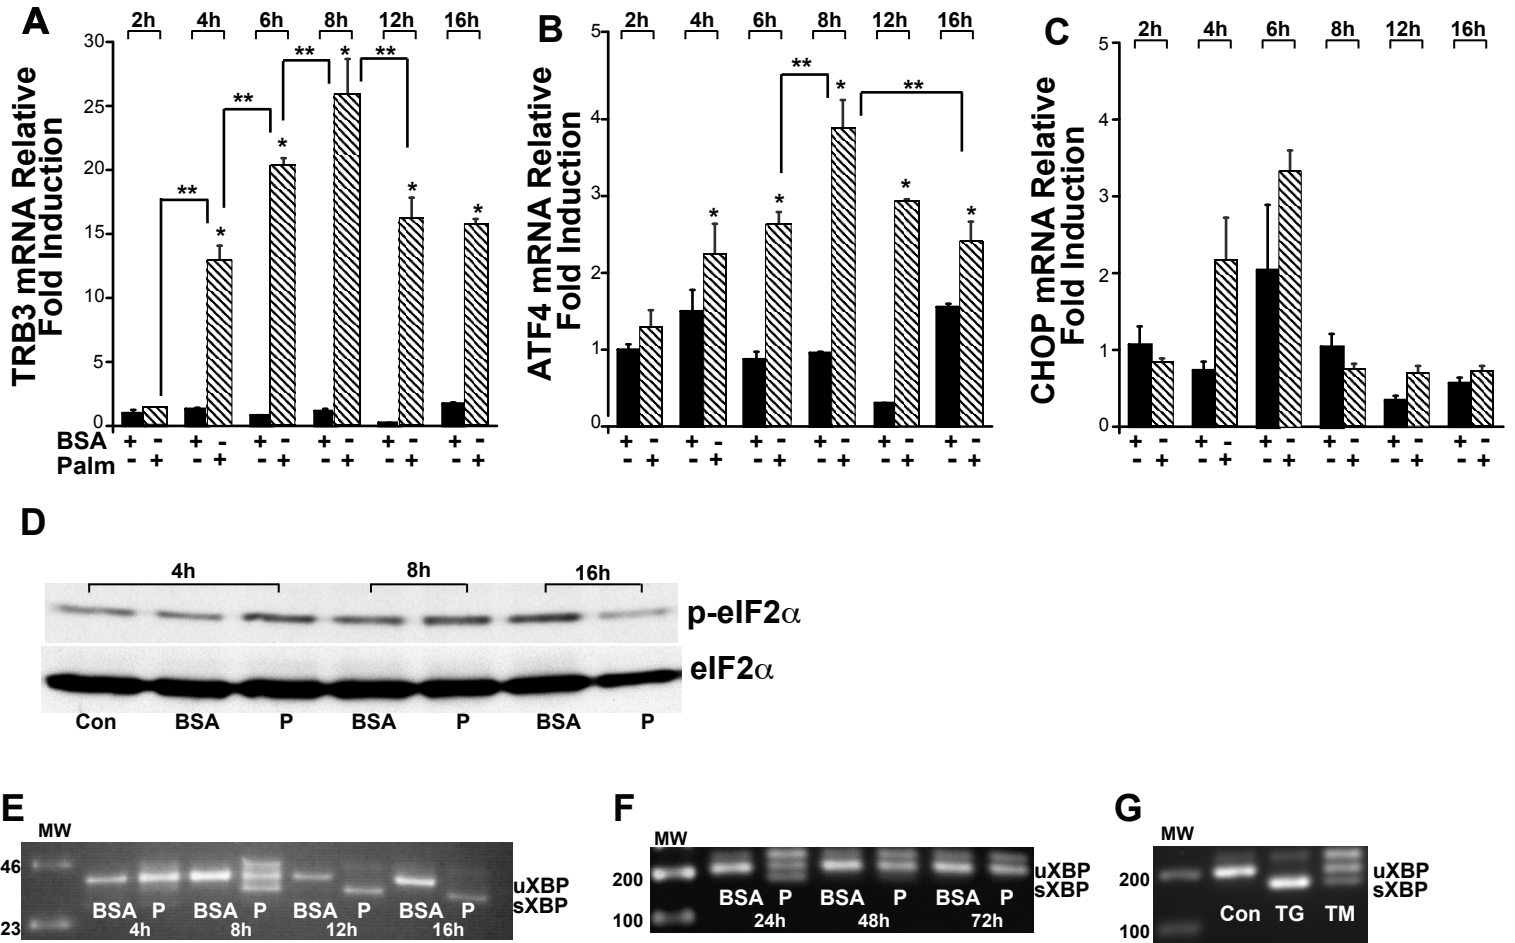

## Supplemental Figure 2

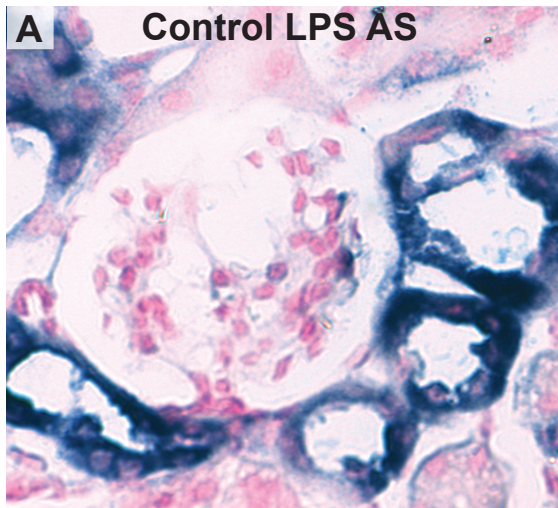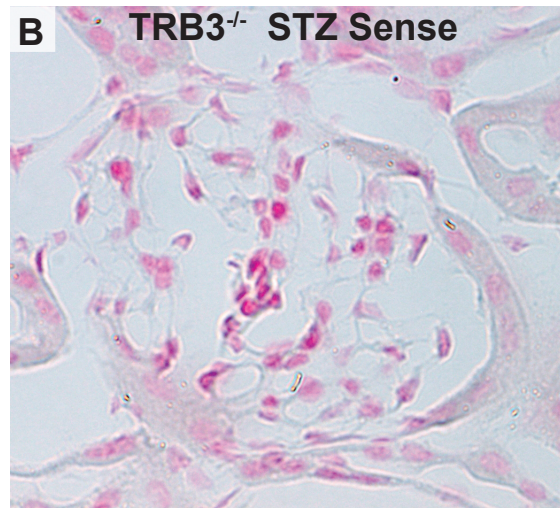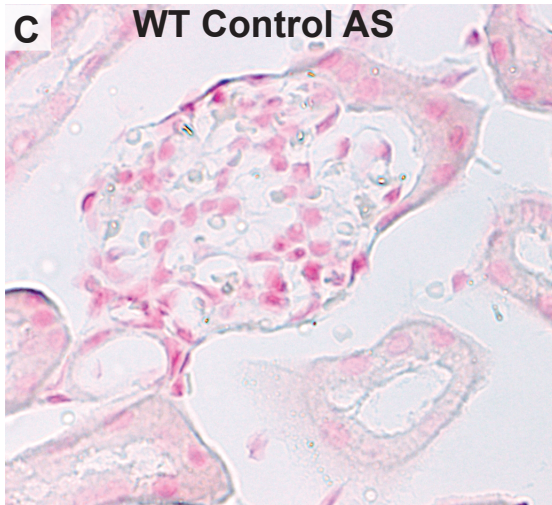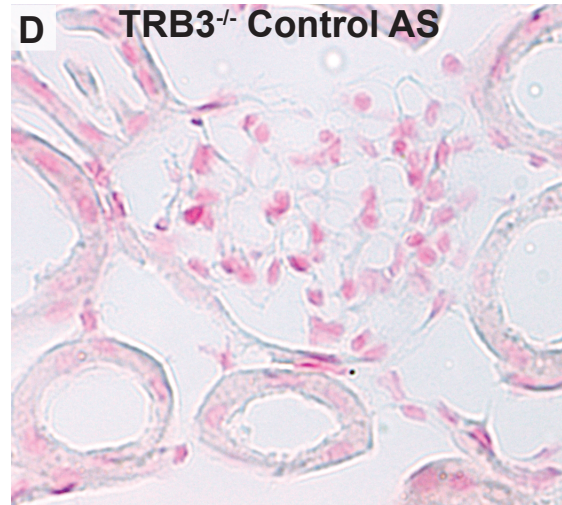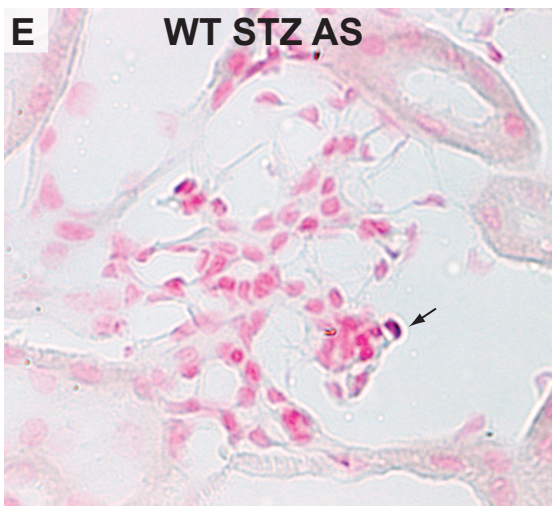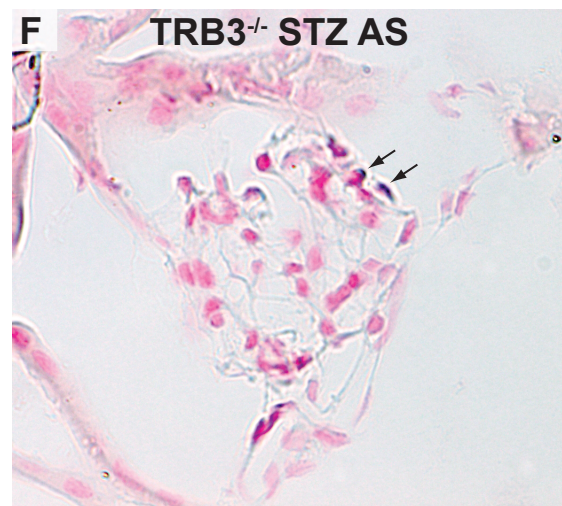

## Supplemental Figures

Supplemental Figure 1. In podocytes palmitate rapidly induces ER Stress. Fully transformed and differentiated murine podocytes were treated with palmitate (palm) 300  $\mu$ M (or bovine serum albumin, BSA) for the indicated time periods. We assessed mRNA expression of A. TRB3, B. ATF4 and C. CHOP. \* represents  $p < 0.05$  vs. BSA 2 hrs. D. Western blotting demonstrates that palmitate (P) rapidly induces phosphorylation of eukaryotic translation initiation factor 2 $\alpha$  (eIF2 $\alpha$ ), by 16 hrs eIF2 $\alpha$  is dephosphorylated. E,F. Semi-quantitative PCR studies revealed splicing of X-box binding protein (XBP1) 8-24 hrs (sXBP) after palmitate treatment, by 48 hrs XBP1 was no longer spliced (uXBP). G. XBP1 splicing after 24 hrs in thapsigargin (TG) and tunicamycin (TM)-treated podocytes.

Supplemental Figure 2. Lipocalin 2/Neutrophil Gelatinase-associated Lipocalin (Lcn2/Ngal) is expressed in the glomeruli of diabetic mice.

A. *In situ* RNA hybridization revealed tubular and glomerular staining of Lcn2/Ngal in LPS-treated mice. B. AS is anti-sense, whereas sense corresponds to the negative control. C-F. There is no obvious Lcn2/Ngal mRNA in the tubules or glomeruli of the citrate-treated mice, however we observed subtle glomerular staining of Lcn2/Ngal in both wildtype (WT) and TRB3<sup>-/-</sup> diabetic mice. The arrows demonstrate positive staining for Lcn2/Ngal.
